# Supplementary material for: Determinants of Covid19 disease and of survival after Covid19 in MPN patients treated with ruxolitinib
Source: Springer Nature journal article supplement (doi:10.1038/s41408-023-00834-6), 2023-05-03

## Supplemental Figure 1. Patient flowchat

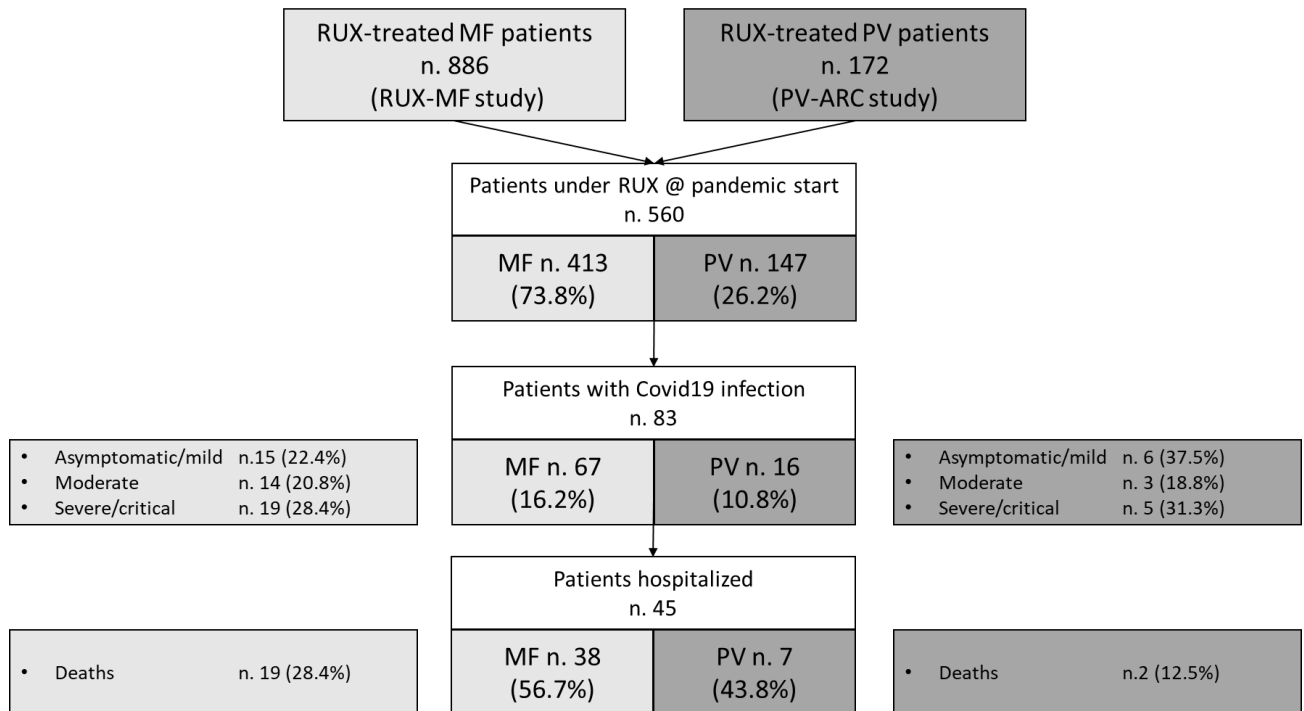

**Supplemental Figure 2. Overall survival by Ruxolitinib continuation or discontinuation.**

Kaplan-Meier curves of overall survival by Ruxolitinib continuation or discontinuation.

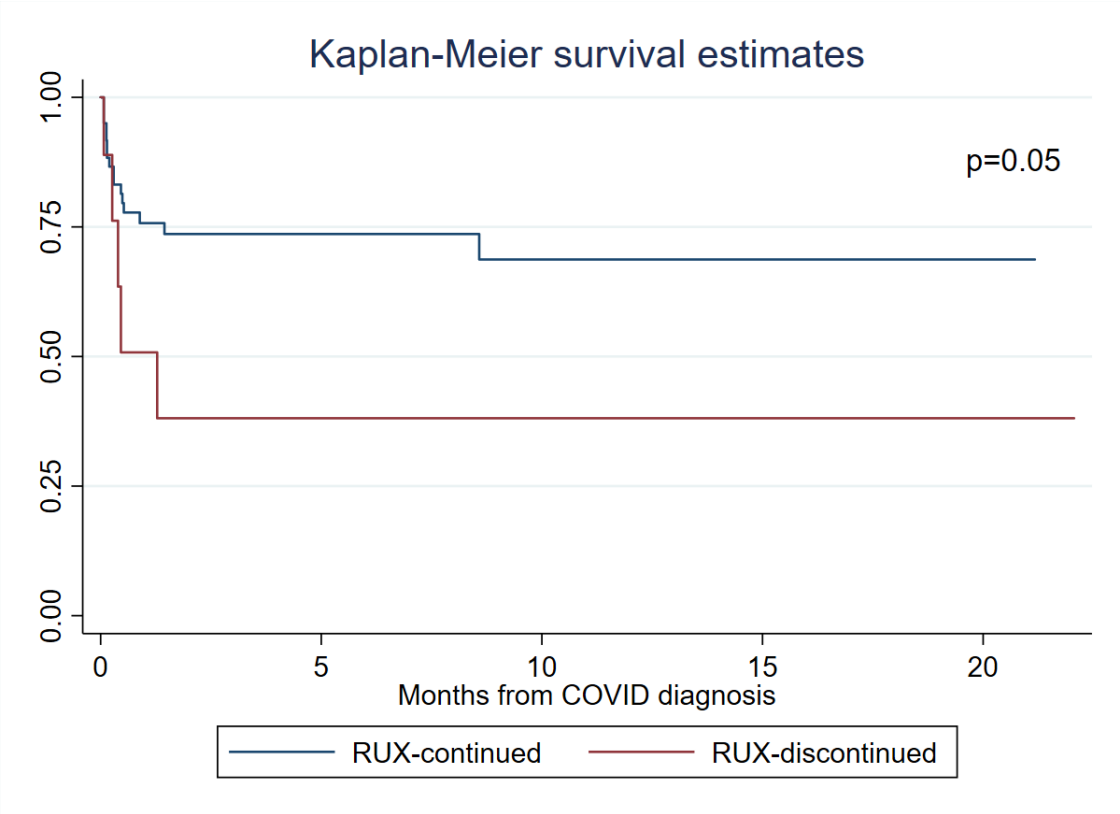

Supplement: MOESM1 [file 41408_2023_834_MOESM1_ESM.pdf]
